# Supplementary material
Source: PubMed Central journal article supplement (PMC3649850)
Supplement: NIHMS403742-supplement-supplement_1.pdf [file NIHMS403742-supplement-supplement_1.pdf]

### Supplemental Digital Content

A more detailed description of the statistical model for CD4 count trajectories and the simulation study is provided here. Specifically, for subject  $i$  with a CD4 count measurement at time  $t$  years after their first seropositive HIV test result,  $CD4_i(t)$ , the model is specified as:

$$\sqrt{CD4_i(t)} = \eta_{it} + \varepsilon_{it}.$$

The model describing how the latent square root CD4 count,  $\eta_{it}$ , changes with time is:

$$\eta_{it} = \beta_0 + \beta_1 t + b_{i0} + b_{i1} t + W_i(t).$$

In this model,  $\beta_0$  is the estimated population mean square root CD4 count at time = 0 (the time of the first seropositive HIV test result) and  $\beta_1$  describes the population mean rate of change over time in square root CD4 count. The estimates (standard errors) of  $\beta_0$  and  $\beta_1$  were 27.03 (0.29) and  $-2.08$  (0.13), respectively.  $b_{i0}$  is patient  $i$ 's deviation from the population mean square root CD4 count at time  $t=0$ , and  $b_{i1}$  is patient  $i$ 's deviation from the population mean rate of change in square root CD4 count. The random effects,  $b_{i0}$  and  $b_{i1}$ , are assumed to arise from a mean zero bivariate normal distribution providing for variability in the intercept and rate of change in CD4 count among patients in the study population. The estimated variances of the  $b_{i0}$  and  $b_{i1}$  were 17.30 and 2.23, and the estimated covariance was  $-0.35$ . The term  $W_i(t)$  is a stochastic process which allows for both periods of slower and periods of faster change in latent CD4 count about the subject's general linear trajectory; these changes are assumed to occur over periods of weeks or months as distinct from the very short-term variability described by  $\varepsilon_{it}$ . We found, as in other studies [12; 14], that the best-fitting stochastic process was a scaled Brownian motion process with estimated variance 1.10. The estimated variance of  $\varepsilon_{it}$  was 10.09.

The goodness of fit of the model used in the simulation study is illustrated in Figure 1 by showing that the cumulative proportions of patients starting ART for different CD4 thresholds are similar to the Kaplan-Meier estimates of these proportions obtained directly from the MACS data (i.e. without assuming a model). In producing the Kaplan-Meier estimates, if a patient had a missing CD4 measurement, follow-up was censored prior to their first missing measurement, thereby avoiding any assumption about whether it was above or below a threshold. This censoring explains why some Kaplan-Meier curves terminate before 60 months.

Having estimated the model parameters, we then used the model with these estimates to generate monthly latent square root CD4 counts,  $\eta_{it}$ , and monthly square root observed CD4 counts,  $\sqrt{CD4_i(t)}$ , for times through to 61 months after the first seropositive HIV test result. Squaring each of these two quantities gave a sequence of monthly latent CD4 counts and a sequence of monthly observed CD4 counts over a 61 month period for each of the 50,000 patients. This simulation assumes that the statistical model is appropriate for monthly measurements and hence that the term  $\varepsilon_{it}$  in the model includes very short-term biological variation over a few days while the model for  $\eta_{it}$  captures longer-term variation over months
